# Supplementary material for: Robustness Can Evolve Gradually in Complex Regulatory Gene Networks with Varying Topology
Source: PLOS journal article supplement (doi:10.1371/journal.pcbi.0030015), 2007-02-02
Supplement: S1 (10.1371/journal.pcbi.0030015.s001) [file journal.pcbi.0030015.s001]

**Table S1: Robustness to mutations and to noise are associated regardless of the**

**number *N* of genes, fraction *c* of regulatory interactions (*M*≈*cN*2) and the distance *d* between initial and equilibrium state.** Shown are Spearman correlation coefficients (*P*-values) between *Rμ* and *Rν,1* for *n*=1000 networks randomly sampled as described in methods. Regulatory interactions are discrete (). “NS” means non-significant.

c=0.1 d=0 d=0.2 d=0.5 d=0.7

N=12 NS NS 0.13 (<10-4) 0.16 (<10-5)

N=20 NS 0.37 (<10-15) 0.54 (<10-15) 0.62 (<10-15)

N=40 0.18 (<10-5) 0.79 (<10-15) 0.82 (<10-15) 0.72 (<10-15)

c=0.25 d=0 d=0.2 d=0.5 d=0.7

N=12 0.12 (<10-3) 0.50 (<10-15) 0.55 (<10-15) 0.57 (<10-15)

N=20 0.20 (<10-5) 0.67 (<10-15) 0.70 (<10-15) 0.56 (<10-15)

N=40 0.29 (<10-15) 0.83 (<10-15) 0.79 (<10-15) 0.77 (<10-15)

c=0.5 d=0 d=0.2 d=0.5 d=0.7

N=12 0.23 (<10-10) 0.51 (<10-15) 0.56 (<10-15) 0.54 (<10-15)

N=20 0.27 (<10-15) 0.68 (<10-15) 0.59 (<10-15) 0.41 (<10-15)

N=40 0.30 (<10-15) 0.83 (<10-15) 0.83 (<10-15) 0.78 (<10-15)
