# Supplementary material for: Robustness Can Evolve Gradually in Complex Regulatory Gene Networks with Varying Topology
Source: PLOS journal article supplement (doi:10.1371/journal.pcbi.0030015), 2007-02-02
Supplement: S2 (10.1371/journal.pcbi.0030015.s002) [file journal.pcbi.0030015.s002]

**Table S2: Robustness to mutations and to noise are associated regardless of the**

**number *N* of genes, fraction *c* of regulatory interactions (*M*≈*cN*2) and the distance *d* between initial and equilibrium state.** Shown are Spearman correlation coefficients (*P*-values) between *Rμ* and *Rν,** for *n*=1000 networks randomly sampled as described in methods. Regulatory interactions are discrete (). “NS” means non-significant.

c=0.1 d=0 d=0.2 d=0.5 d=0.7

N=12 NS NS NS NS

N=20 NS 0.30 (<10-15) 0.49 (<10-15) 0.56 (<10-15)

N=40 0.17 (<10-5) 0.68 (<10-15) 0.80 (<10-15) 0.71 (<10-15)

c=0.25 d=0 d=0.2 d=0.5 d=0.7

N=12 0.10 (0.002) 0.43 (<10-15) 0.52 (<10-15) 0.56 (<10-15)

N=20 0.19 (<10-5) 0.59 (<10-15) 0.70 (<10-15) 0.56 (<10-15)

N=40 0.25 (<10-15) 0.82 (<10-15) 0.81 (<10-15) 0.75 (<10-15)

c=0.5 d=0 d=0.2 d=0.5 d=0.7

N=12 0.23 (<10-10) 0.46 (<10-15) 0.57 (<10-15) 0.56 (<10-15)

N=20 0.25 (<10-15) 0.63 (<10-15) 0.59 (<10-15) 0.40 (<10-15)

N=40 0.29 (<10-15) 0.81 (<10-15) 0.82 (<10-15) 0.78 (<10-15)
