# Supplementary material for: Robustness Can Evolve Gradually in Complex Regulatory Gene Networks with Varying Topology
Source: PLOS journal article supplement (doi:10.1371/journal.pcbi.0030015), 2007-02-02
Supplement: S3 (10.1371/journal.pcbi.0030015.s003) [file journal.pcbi.0030015.s003]

**Table S3: Robustness to mutations and to noise are associated regardless of the**

**number *N* of genes, fraction *c* of regulatory interactions (*M*=*cN*2) and the distance *d* between initial and equilibrium state.** Shown are Spearman correlation coefficients (*P*-values) between *Rμ* and *Rν,1* for *n*=1000 networks randomly sampled as described in methods. Regulatory interactions are continuous. “NS” means non-significant.

c=0.1 d=0 d=0.2 d=0.5 d=0.7

N=12 NS NS NS NS

N=20 0.07 (0.017) NS 0.17 (<10-5) 0.27 (<10-15)

N=40 0.28 (<10-15) 0.33 (<10-20) 0.64 (<10-15) 0.68 (<10-15)

c=0.25 d=0 d=0.2 d=0.5 d=0.7

N=12 0.23 (<10-10) 0.06 (0.046) 0.36 (<10-15) 0.37 (<10-15)

N=20 0.32 (<10-15) 0.26 (<10-15) 0.55 (<10-15) 0.54 (<10-15)

N=40 0.42 (<10-15) 0.45 (<10-15) 0.36 (<10-15) 0.28 (<10-15)

c=0.5 d=0 d=0.2 d=0.5 d=0.7

N=12 0.34 (<10-15) 0.18 (<10-5) NS 0.42 (<10-15)

N=20 0.46 (<10-15) 0.36 (<10-15) 0.24 (<10-15) 0.13 (<10-4)

N=40 0.50 (<10-15) 0.50 (<10-15) 0.50 (<10-15) 0.49 (<10-15)
