# Supplementary material for: Robustness Can Evolve Gradually in Complex Regulatory Gene Networks with Varying Topology
Source: PLOS journal article supplement (doi:10.1371/journal.pcbi.0030015), 2007-02-02
Supplement: S4 (10.1371/journal.pcbi.0030015.s004) [file journal.pcbi.0030015.s004]

**Table S4: Robustness to mutations and to noise are associated regardless of the**

**number *N* of genes, fraction *c* of regulatory interactions (*M*≈*cN*2) and the distance *d* between initial and equilibrium state.** Shown are Spearman correlation coefficients (*P*-values) between *Rμ* and *Rν,** for *n*=1000 networks randomly sampled as described in methods. Regulatory interactions are continuous. “NS” means non-significant.

c=0.1 d=0 d=0.2 d=0.5 d=0.7

N=12 NS NS NS NS

N=20 NS NS 0.12 (<10-4) 0.23 (<10-10)

N=40 0.19 (<10-5) 0.23 (<10-10) 0.55 (<10-15) 0.63 (<10-15)

c=0.25 d=0 d=0.2 d=0.5 d=0.7

N=12 0.22 (<10-10) NS 0.25 (<10-10) 0.30 (<10-15)

N=20 0.27 (<10-15) 0.18 ( <10-5) 0.48 (<10-15) 0.48 (<10-15)

N=40 0.36 (<10-15) 0.43 (<10-15) 0.35 (<10-15) 0.28 (<10-15)

c=0.5 d=0 d=0.2 d=0.5 d=0.7

N=12 0.32 (<10-15) 0.12 (<10-3) NS 0.39 (<10-15)

N=20 0.41 (<10-15) 0.33 (<10-15) 0.24 (<10-15) 0.13 (<10-4)

N=40 0.45 (<10-15) 0.49 (<10-15) 0.49 (<10-15) 0.48 (<10-15)
