# Supplementary material for: Robustness Can Evolve Gradually in Complex Regulatory Gene Networks with Varying Topology
Source: PLOS journal article supplement (doi:10.1371/journal.pcbi.0030015), 2007-02-02
Supplement: S5 (10.1371/journal.pcbi.0030015.s005) [file journal.pcbi.0030015.s005]

**Table S5: Few networks are not in the giant connected metagraph component, and**

**most of these networks are isolated.** Values in columns 3 and 4 were obtained as outlined in “Numerically determining metagraph connectivity” for samples of *V*=105 (*N*=6,8) and *V*=104 (*N*=12, 20) randomly chosen viable networks. Values preceeded by “<” might be equal to zero, but this cannot be ascertained numerically. Total number of regulatory interactions *M*≈*cN*2.

| N | c | d | Fraction of networks not in giant component (upper bound) | Fraction of isolated networks |
| --- | --- | --- | --- | --- |
| 20 | 0.25 | 0.5 | 1.4×10-3 | 1.4×10-3 |
| 20 | 0.5 | 0.5 | 1.4×10-3 | 1.4×10-3 |
| 12 | 0.25 | 0 | <10-4 | <10-4 |
| 12 | 0.25 | 0.25 | 1.0×10-4 | 1.0×10-4 |
| 12 | 0.25 | 0.5 | 1.7×10-3 | 1.7×10-3 |
| 12 | 0.25 | 0.75 | 3.1×10-3 | 3.1×10-3 |
| 12 | 0.5 | 0 | <10-4 | <10-4 |
| 12 | 0.5 | 0.25 | 7.0×10-4 | 7.0×10-4 |
| 12 | 0.5 | 0.5 | 1.2×10-3 | 1.2×10-3 |
| 12 | 0.5 | 0.75 | 1.8×10-3 | 1.8×10-3 |
| 8 | 0.25 | 0 | <10-5 | <10-5 |
| 8 | 0.25 | 0.25 | 3.6×10-4 | 3.6×10-4 |
| 8 | 0.25 | 0.5 | 2.3×10-3 | 2.3×10-3 |
| 8 | 0.25 | 0.75 | 7.5×10-3 | 7.5×10-3 |
| 8 | 0.5 | 0 | <10-5 | <10-5 |
| 8 | 0.5 | 0.25 | 7.4×10-4 | 7.4×10-4 |
| 8 | 0.5 | 0.5 | 1.3×10-3 | 1.3×10-3 |
| 8 | 0.5 | 0.75 | 4.2×10-3 | 4.2×10-3 |
| 6 | 0.25 | 0 | <10-5 | <10-5 |
| 6 | 0.25 | 0.25 | 7.5×10-4 | 7.5×10-4 |
| 6 | 0.25 | 0.5 | 1.3×10-2 | 1.3×10-2 |
| 6 | 0.25 | 0.75 | 2.5×10-2 | 2.5×10-2 |
| 6 | 0.5 | 0 | <10-5 | <10-5 |
| 6 | 0.5 | 0.25 | 4.8×10-4 | 4.6×10-4 |
| 6 | 0.5 | 0.5 | 3.0×10-3 | 2.9×10-3 |
| 6 | 0.5 | 0.75 | 5.8×10-3 | 5.3×10-3 |
